# Supplementary material for: Cardiotoxicity Secondary to Immune Checkpoint Inhibitors in the Elderly: Safety in Real-World Data
Source: MDPI journal article supplement (doi:10.3390/cancers15174293), 2023-08-28

**Table S1.** - Main immune checkpoints antibodies approved for the treatment of solid tumours.

| Immune checkpoint inhibitors   | Immunoglobulin type | Target molecule | Tumour type                                                                                                                                                                                                                                                                                                                                                                                                                                                                                                                                                                                                                                                                                                                                                                                                                                                                                                                                                 |
|--------------------------------|---------------------|-----------------|-------------------------------------------------------------------------------------------------------------------------------------------------------------------------------------------------------------------------------------------------------------------------------------------------------------------------------------------------------------------------------------------------------------------------------------------------------------------------------------------------------------------------------------------------------------------------------------------------------------------------------------------------------------------------------------------------------------------------------------------------------------------------------------------------------------------------------------------------------------------------------------------------------------------------------------------------------------|
| <b>Ipilimumab (MDX-010)</b>    | IgG-1 $\kappa$      | CTLA-4          | Advanced melanoma (alone second-line or in combination with Nivolumab in first-line).<br>Advanced renal cancer (in combination with Nivolumab in first-line).<br>Advanced lung cancer (in combination with chemotherapy and Nivolumab in first-line).<br>Advanced pleural mesothelioma (in combination with Nivolumab in first-line).<br>Advanced dMMR colorectal cancer (in combination with Nivolumab in first-line).<br>Advanced squamous oesophageal cancer (in combination with Nivolumab with PDL-1 $\geq 1\%$ ).                                                                                                                                                                                                                                                                                                                                                                                                                                     |
| <b>Pembrolizumab (MK-3475)</b> | IgG-4 $\kappa$      | PD-1            | Advanced melanoma and adjuvant (alone).<br>First-line metastatic NSCLC (alone in first PDL-1 $\geq 50\%$ or in combination with CT in PDL-1 $< 50\%$ ).<br>Second line metastatic NSCLC (alone with PDL-1 $\geq 1\%$ ).<br>Refractory Hodgkin lymphoma (alone).<br>Advanced bladder cancer (alone in second-line).<br>Advanced head and neck cancer (in first line in combination with CT in CPS $\geq 1$ or monotherapy in CPS $\geq 50\%$ ).<br>Advanced renal cancer (in combination with Lenvatinib or Axitinib) or in adjuvant.<br>All dMMR solid tumours (alone in first-line).<br>Advanced oesophageal cancer (plus CT in CPS $\geq 10\%$ ).<br>Advanced triple negative breast cancer (plus CT in CPS $\geq 10\%$ or PDL-1+).<br>Neoadjuvant and adjuvant triple negative breast cancer (plus CT).<br>Advanced endometrial cancer (second-line with Lenvatinib).<br>Advanced cervical cancer (first-line with CT +/- Bevacizumab in CPS $\geq 1$ ). |
| <b>Nivolumab (MDX-1106)</b>    | IgG4                | PD-1            | Advanced melanoma (plus CT or alone) and adjuvant (alone).<br>First-line metastatic NSCLC (plus Nivolumab and CT).<br>Second-line metastatic NSCLC (alone).<br>Advanced pleural mesothelioma (in combination with Ipilimumab).<br>Advanced renal cancer (first-line with Ipilimumab or Cabozantinib and second-line alone).<br>Refractory Hodgkin lymphoma (alone).<br>Advanced bladder cancer (alone in second-line).<br>Advanced head and neck cancer (alone in second-line).                                                                                                                                                                                                                                                                                                                                                                                                                                                                             |

|                                     |      |        |                                                                                                                                                                                                                                                |
|-------------------------------------|------|--------|------------------------------------------------------------------------------------------------------------------------------------------------------------------------------------------------------------------------------------------------|
|                                     |      |        | Advanced dMMR colorectal cancer (in combination with Ipilimumab).<br>Advanced oesophageal cancer (plus CT or alone or plus Ipilimumab).                                                                                                        |
| <b>Atezolizumab<br/>(MPDL3280A)</b> | IgG1 | PD-L1  | Advanced bladder cancer (alone in second line).<br>Metastatic NSCLC (in first-line in combination with CT and Bevacizumab or in second-line alone).<br>Advanced SCLC (in first-line plus CT).                                                  |
| <b>Durvalumab<br/>(MEDI4736)</b>    | IgG1 | PD-L1  | Locally advanced unresectable non-small cell lung cancer (after CT/RT with PDL-1 $\geq 1\%$ in tumour cells).<br>Advanced SCLC (in first-line plus CT).<br>Advanced hepatocellular carcinoma (in first-line in combination with Tremelimumab). |
| <b>Avelumab<br/>(MSB0010718C)</b>   | IgG1 | PD-L1  | Metastatic Merkel cell carcinoma (alone).<br>Advanced urothelial cancer in maintenance after CT in first-line.<br>Advanced renal cancer (plus Axitinib in first-line).                                                                         |
| <b>Cemiplimab<br/>(REGN-2810)</b>   | IgG4 | PD-1   | Advanced squamous cell carcinoma (first-line alone).<br>Advanced nasal-cell carcinoma (after or not tolerance to Vismodegib).<br>Advanced NSCLC (alone in first-line in PDL-1 $\geq 50\%$ )                                                    |
| <b>Dostarlimab<br/>(TSR-042)</b>    | IgG4 | PD-1   | Advanced dMMR endometrial cancer (alone in second-line).                                                                                                                                                                                       |
| <b>Tremelimumab<br/>(CP-675)</b>    | IgG2 | CTLA-4 | Advanced hepatocellular carcinoma (in first-line in combination with Durvalumab).                                                                                                                                                              |
| <b>Relatlimab<br/>(BMS-986016)</b>  | IgG4 | LAG-3  | Advanced melanoma (in combination with Nivolumab in first-line).*                                                                                                                                                                              |

\*Abbreviations: CPS combined positive score; CT chemotherapy; CTLA-4 Cytotoxic T-Lymphocyte Antigen 4; CT/RT chemotherapy plus radiotherapy; dMMR deficient DNA mismatch repair system; LAG-3 Lymphocyte-activation gene 3; NSCLC non-small-cell lung cancer; PD-1 Programmed Death 1; PD-L1 Programmed Death-ligand 1; SCLC small-cell lung cancer.

Figure S1. – Flow diagram of the study.

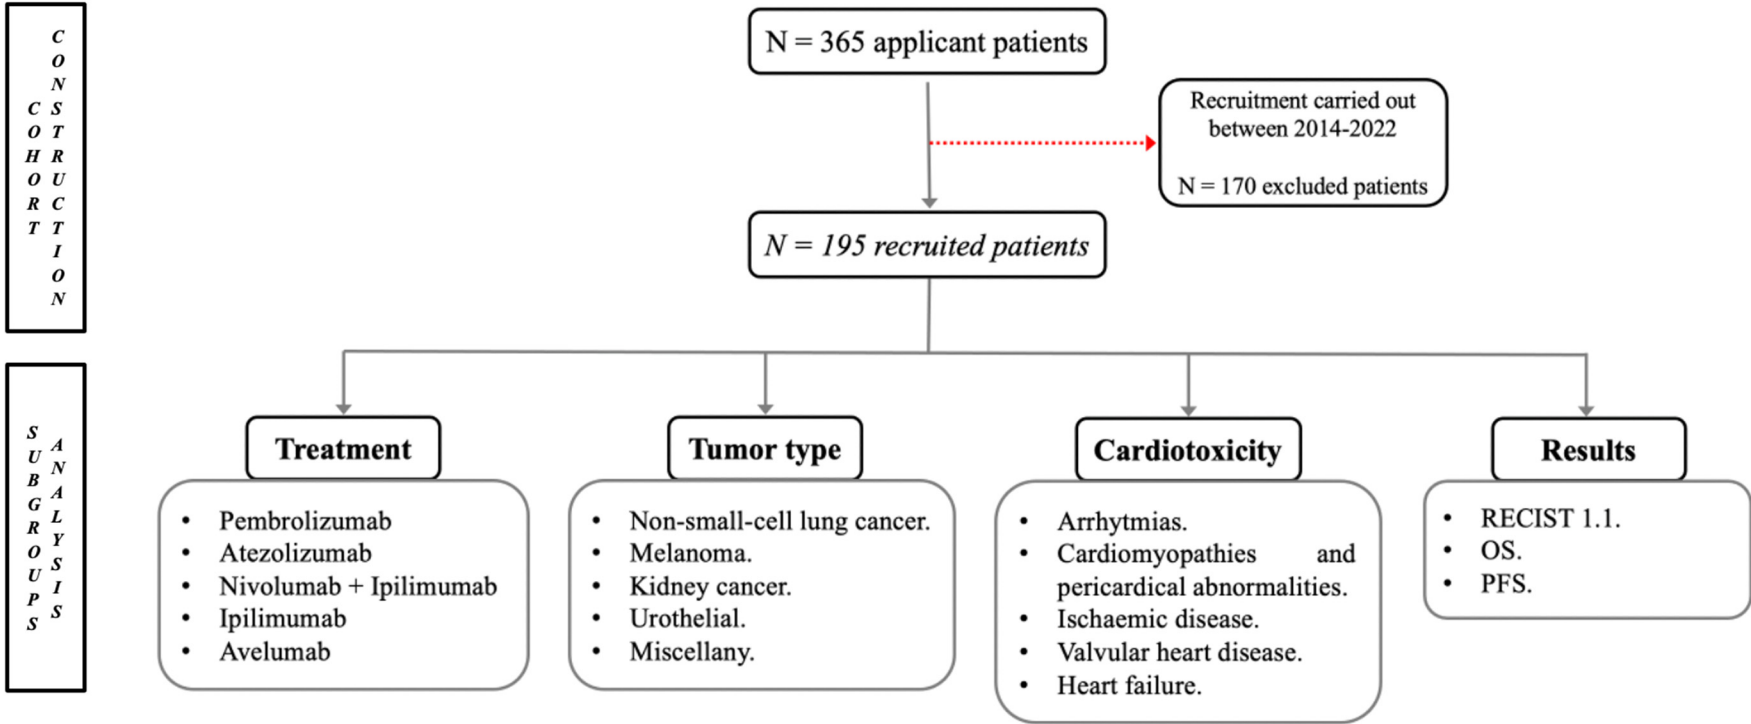

Supplement: s1 [file s1]
